# Supplementary material for: trans-Trismethoxy resveratrol decreased fat accumulation dependent on fat-6 and fat-7 in Caenorhabditis elegans
Source: Royal Society of Chemistry journal article supplement (doi:10.1039/c9fo00778d), 2019-01-01
Supplement: c9fo00778d1.pdf [file c9fo00778d1.pdf]

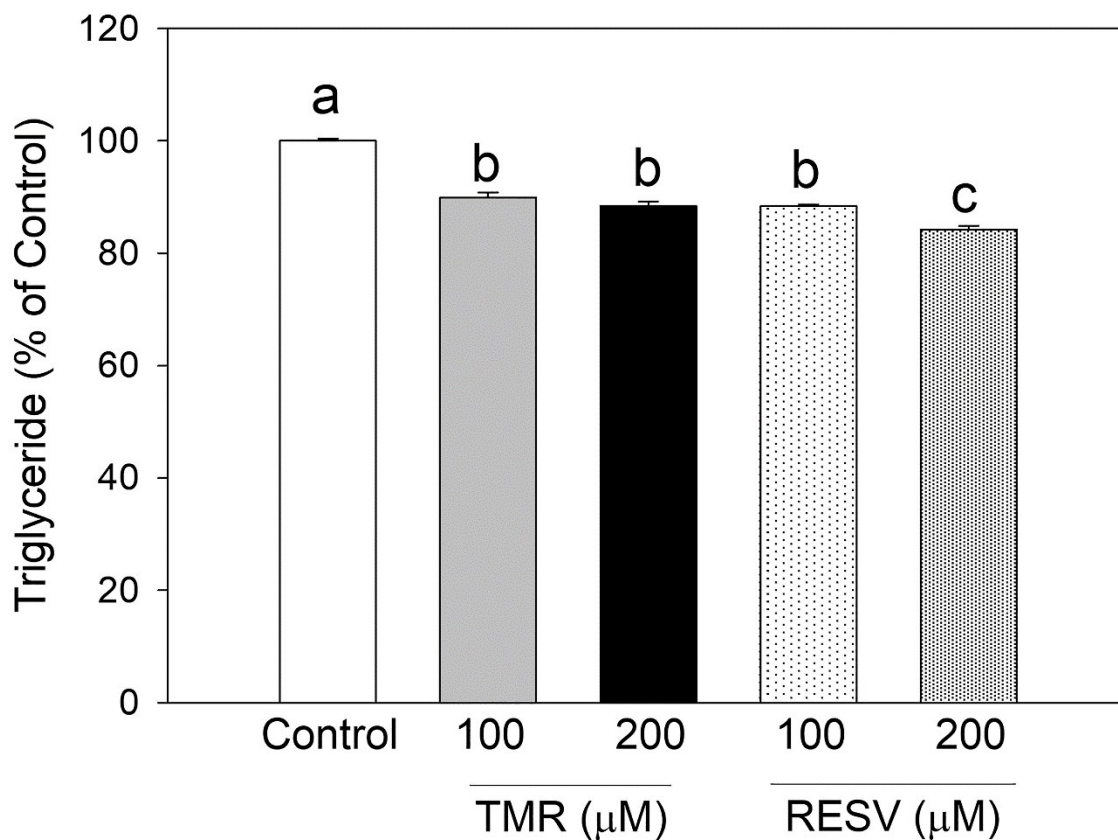

1

2 **Supplementary Figure S1. Comparison of fat reduction between resveratrol and *trans*-**  
3 **trismethoxy resveratrol on wild type N2 worms.** Synchronized L1 worms were treated with  
4 control (0.1% DMSO) or *trans*-trismethoxy resveratrol (100 and 200 μM) or resveratrol (100 and  
5 200 μM) for 4 days at 20°C. Triglyceride content was measured and normalized by protein level.  
6 Results are expressed as mean ±S.E (n=4 plates, each plate contained >1000 nematodes). <sup>a-c</sup>  
7 Means with different letters are significantly different ( $P<0.05$ ). TMR: *trans*-trismethoxy  
8 resveratrol; RESV: resveratrol.
